# Supplementary material for: Roll-to-roll gravure-printed flexible perovskite solar cells using eco-friendly antisolvent bathing with wide processing window
Source: PubMed Central journal article supplement (PMC7555830; doi:10.1038/s41467-020-18940-5), 2020-10-13
Supplement: 41467_2020_18940_MOESM2_ESM.pdf [file 41467_2020_18940_MOESM2_ESM.pdf]

## **Description of Additional Supplementary Files**

File Name: Supplementary Movie 1

Description: R2R Gravure-printing of flexible PSCs
