# Supplementary material for: Roll-to-roll gravure-printed flexible perovskite solar cells using eco-friendly antisolvent bathing with wide processing window
Source: PubMed Central journal article supplement (PMC7555830; doi:10.1038/s41467-020-18940-5), 2020-10-13
Supplement: 41467_2020_18940_MOESM4_ESM.pdf [file 41467_2020_18940_MOESM4_ESM.pdf]

## Solar Cells Reporting Summary

Nature Research wishes to improve the reproducibility of the work that we publish. This form is intended for publication with all accepted papers reporting the characterization of photovoltaic devices and provides structure for consistency and transparency in reporting. Some list items might not apply to an individual manuscript, but all fields must be completed for clarity.

For further information on Nature Research policies, including our [data availability policy](#), see [Authors & Referees](#).

## ► Experimental design

## Please check: are the following details reported in the manuscript?

## 1. Dimensions

- Area of the tested solar cells  Yes  No Methods Section; 0.096 cm<sup>2</sup>
- Method used to determine the device area  Yes  No Methods Section; measured by optical microscope

## 2. Current-voltage characterization

- Current density-voltage (J-V) plots in both forward and backward direction  Yes  No Figure 3d, Figure 4e, Figure 6f
- Voltage scan conditions  Yes  No Methods Section; Reverse (1.2 to -0.2V), Forward (-0.2 to 1.2V), delay time of 10 ms.  
*For instance: scan direction, speed, dwell times*
- Test environment  Yes  No Ambient environment (25 °C, 30-40% RH)  
*For instance: characterization temperature, in air or in glove box*
- Protocol for preconditioning of the device before its characterization  Yes  No No preconditioning step was used.
- Stability of the J-V characteristic  Yes  No Figure 4f; Maximum powerpoint tracking measurement  
*Verified with time evolution of the maximum power point or with the photocurrent at maximum power point; see [ref. 7](#) for details.*

## 3. Hysteresis or any other unusual behaviour

- Description of the unusual behaviour observed during the characterization  Yes  No No unusual behavior was observed during measurement. A small amount of hysteresis was observed.
- Related experimental data  Yes  No Figure 3d, Figure 4e, Figure 6f

## 4. Efficiency

- External quantum efficiency (EQE) or incident photons to current efficiency (IPCE)  Yes  No Supplementary Figure 15
- A comparison between the integrated response under the standard reference spectrum and the response measure under the simulator  Yes  No Short-circuit current density was well-matched with the value obtained from external quantum efficiency measurement. (Figure 4f and Supplementary Figure 15)
- For tandem solar cells, the bias illumination and bias voltage used for each subcell  Yes  No No tandem cells were fabricated in this manuscript.

## 5. Calibration

- Light source and reference cell or sensor used for the characterization  Yes  No Methods Section; Solar simulator (Newport, Oriel Class A, 91195A)
- Confirmation that the reference cell was calibrated and certified  Yes  No Methods Section; Light intensity was calibrated Si-reference cell certified by the NREL, USA.

|                                                                                                                                                                                               |                                                                        |                                                                                                                                          |
|-----------------------------------------------------------------------------------------------------------------------------------------------------------------------------------------------|------------------------------------------------------------------------|------------------------------------------------------------------------------------------------------------------------------------------|
| Calculation of spectral mismatch between the reference cell and the devices under test                                                                                                        | <input checked="" type="checkbox"/> Yes<br><input type="checkbox"/> No | It has been calibrated.                                                                                                                  |
| <b>6. Mask/aperture</b>                                                                                                                                                                       |                                                                        |                                                                                                                                          |
| Size of the mask/aperture used during testing                                                                                                                                                 | <input checked="" type="checkbox"/> Yes<br><input type="checkbox"/> No | Methods Section; 0.096 cm <sup>2</sup> of mask was used for testing.                                                                     |
| Variation of the measured short-circuit current density with the mask/aperture area                                                                                                           | <input type="checkbox"/> Yes<br><input checked="" type="checkbox"/> No | We don't added the data; but we observed that there is no obvious changes in short-circuit current upon varying the size of active area. |
| <b>7. Performance certification</b>                                                                                                                                                           |                                                                        |                                                                                                                                          |
| Identity of the independent certification laboratory that confirmed the photovoltaic performance                                                                                              | <input type="checkbox"/> Yes<br><input checked="" type="checkbox"/> No | It was not certified.                                                                                                                    |
| A copy of any certificate(s)<br><i>Provide in Supplementary Information</i>                                                                                                                   | <input type="checkbox"/> Yes<br><input checked="" type="checkbox"/> No | It was not certified.                                                                                                                    |
| <b>8. Statistics</b>                                                                                                                                                                          |                                                                        |                                                                                                                                          |
| Number of solar cells tested                                                                                                                                                                  | <input checked="" type="checkbox"/> Yes<br><input type="checkbox"/> No | At least 24 devices each for glass-based, table-top gravure-printed, and R2R gravure-printed devices were tested.                        |
| Statistical analysis of the device performance                                                                                                                                                | <input checked="" type="checkbox"/> Yes<br><input type="checkbox"/> No | Figure 3a-c, Supplementary Figure 16-17, 21.                                                                                             |
| <b>9. Long-term stability analysis</b>                                                                                                                                                        |                                                                        |                                                                                                                                          |
| Type of analysis, bias conditions and environmental conditions<br><i>For instance: illumination type, temperature, atmosphere humidity, encapsulation method, preconditioning temperature</i> | <input checked="" type="checkbox"/> Yes<br><input type="checkbox"/> No | Section "Pilot-scale R2R gravure-printing of flexible PSCs" and Supplementary Figure 22.                                                 |
